# Supplementary material
Source: PubMed Central journal article supplement (PMC3243934)
Supplement: supp_kwr210_kwr210_Web_Table_1.pdf [file supp_kwr210_kwr210_Web_Table_1.pdf]

**Web Table 1.** Adjusted Relative Risks for All-Site Cancer Mortality, by Total Alcohol Consumption and Age Strata, in a Pooled National Health Interview Survey Cohort (1988,1990,1991,1997–2004) Through 2006, United States<sup>a</sup>

| Age Strata<br>Drinking Status<br>Drinking Level | All    |        |            | Men    |        |            | Women  |        |            |
|-------------------------------------------------|--------|--------|------------|--------|--------|------------|--------|--------|------------|
|                                                 | Deaths | RR     | 95% CI     | Deaths | RR     | 95% CI     | Deaths | RR     | 95% CI     |
| Age <65                                         |        |        |            |        |        |            |        |        |            |
| Never drinker                                   | 431    | 1      |            | 109    | 1      |            | 322    | 1      |            |
| Former drinker                                  | 366    | 1.03   | 0.87, 1.21 | 210    | 1.17   | 0.90, 1.53 | 156    | 0.91   | 0.73, 1.13 |
| Lifetime infrequent drinker                     | 385    | 0.87   | 0.74, 1.03 | 113    | 0.90   | 0.67, 1.22 | 272    | 0.86   | 0.71, 1.05 |
| Current drinker                                 |        |        |            |        |        |            |        |        |            |
| Light drinker                                   | 609    | 0.70   | 0.60, 0.81 | 290    | 0.80   | 0.63, 1.03 | 319    | 0.64   | 0.52, 0.77 |
| Moderate drinker                                | 307    | 0.70   | 0.57, 0.85 | 222    | 0.77   | 0.58, 1.01 | 85     | 0.70   | 0.52, 0.93 |
| Heavier drinker                                 | 240    | 1.11   | 0.91, 1.36 | 156    | 1.27   | 0.95, 1.70 | 84     | 0.96   | 0.71, 1.30 |
| <i>P trend</i> <sup>b</sup>                     |        | <0.001 |            |        | 0.001  |            |        | 0.13   |            |
| Age 65 - 79                                     |        |        |            |        |        |            |        |        |            |
| Never drinker                                   | 773    | 1      |            | 187    | 1      |            | 586    | 1      |            |
| Former drinker                                  | 710    | 1.07   | 0.94, 1.22 | 449    | 1.19   | 0.97, 1.48 | 261    | 0.98   | 0.82, 1.16 |
| Lifetime infrequent drinker                     | 591    | 0.91   | 0.81, 1.03 | 218    | 1.00   | 0.79, 1.26 | 373    | 0.87   | 0.75, 1.01 |
| Current drinker                                 |        |        |            |        |        |            |        |        |            |
| Light drinker                                   | 652    | 0.86   | 0.75, 0.98 | 367    | 0.95   | 0.77, 1.18 | 285    | 0.79   | 0.66, 0.94 |
| Moderate drinker                                | 518    | 1.03   | 0.90, 1.18 | 384    | 1.09   | 0.89, 1.34 | 134    | 1.06   | 0.84, 1.34 |
| Heavier drinker                                 | 290    | 1.25   | 1.07, 1.46 | 179    | 1.34   | 1.06, 1.69 | 111    | 1.26   | 1.00, 1.58 |
| <i>P trend</i> <sup>b</sup>                     |        | <0.001 |            |        | <0.001 |            |        | <0.001 |            |
| Age ≥80                                         |        |        |            |        |        |            |        |        |            |
| Never drinker                                   | 754    | 1      |            | 164    | 1      |            | 590    | 1      |            |
| Former drinker                                  | 496    | 1.28   | 1.11, 1.48 | 291    | 1.41   | 1.13, 1.77 | 205    | 1.25   | 1.03, 1.52 |
| Lifetime infrequent drinker                     | 474    | 1.08   | 0.95, 1.23 | 162    | 1.21   | 0.96, 1.53 | 312    | 1.00   | 0.85, 1.18 |
| Current drinker                                 |        |        |            |        |        |            |        |        |            |
| Light drinker                                   | 408    | 1.06   | 0.92, 1.21 | 217    | 1.30   | 1.04, 1.63 | 191    | 0.86   | 0.71, 1.04 |
| Moderate drinker                                | 266    | 1.15   | 0.96, 1.38 | 198    | 1.38   | 1.09, 1.76 | 68     | 0.91   | 0.68, 1.22 |
| Heavier drinker                                 | 92     | 1.32   | 1.02, 1.71 | 42     | 1.27   | 0.87, 1.87 | 50     | 1.45   | 1.02, 2.07 |
| <i>P trend</i> <sup>b</sup>                     |        | 0.03   |            |        | 0.20   |            |        | 0.06   |            |

Abbreviations: RR, relative risk CI, confidence interval.

a. Analyses were adjusted for race/ethnicity, education, region, marital status, smoking status (including tertiles of smoking intensity for current smokers), body mass index, and gender as appropriate.

b. *P* values are for linear trend and do not include lifetime infrequent drinkers and former drinkers.
